# Supplementary material for: Biodegradable MoOx@MB incorporated hydrogel as light-activated dressing for rapid and safe bacteria eradication and wound healing
Source: Royal Society of Chemistry journal article supplement (doi:10.1039/d2ra00963c), 2022-01-01
Supplement: d2ra00963c1.pdf [file d2ra00963c1.pdf]

## Supporting Information

### Biodegradable $\text{MoO}_x@MB$ Incorporated Hydrogel as Light-Activated Dressing for Rapid and Safe Bacteria Eradication and Wound Healing

Yifan Wang,<sup>a</sup> Huiqin Yao,<sup>\*a</sup> Yan Zu,<sup>\*b</sup> Wenyan Yin,<sup>\*b</sup>

<sup>a</sup> College of Pharmacy, School of Basic Medicine, Ningxia Medical University, Yinchuan, Ningxia 750004, China

<sup>b</sup> CAS Key Laboratory for Biomedical Effects of Nanomaterials and Nanosafety, Institute of High Energy Physics and National Center for Nanoscience and Technology, Chinese Academy of Sciences, Beijing 100049, China

\*E-mail: huiqin\_yao@163.com, zuyan@ihep.ac.cn, yinwy@ihep.ac.cn

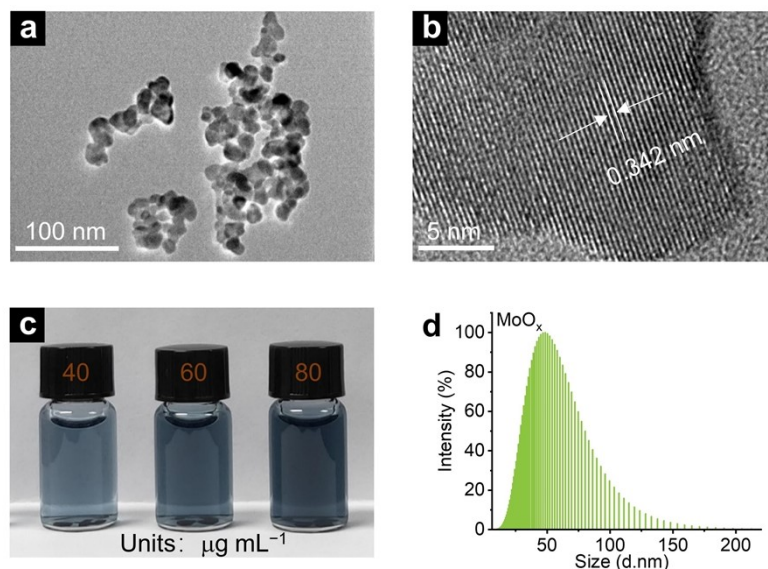

**Fig. S1** (a) TEM and (b) HR-TEM images of  $\text{MoO}_x$  NPs. (c) Photographs of  $\text{MoO}_x$  NPs water solutions with different concentrations. (d) DLS pattern of  $\text{MoO}_x$  NPs solutions.

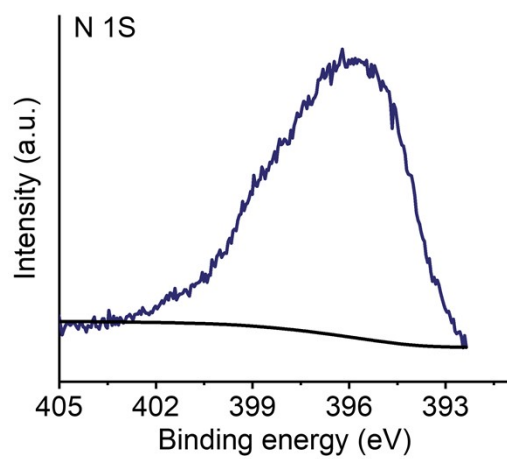

**Fig. S2** XPS spectrum of N 1s.

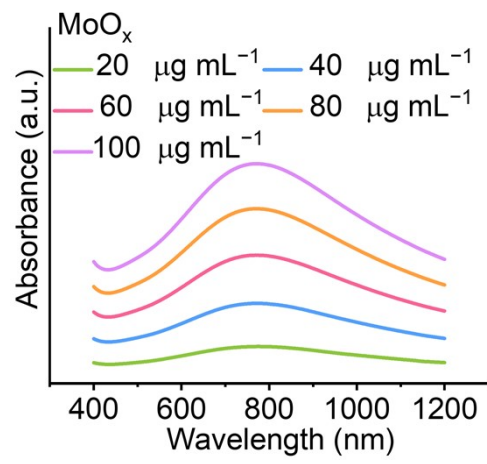

**Fig. S3** UV–Vis-NIR absorption spectra of the MoO<sub>x</sub> NPs water solutions.

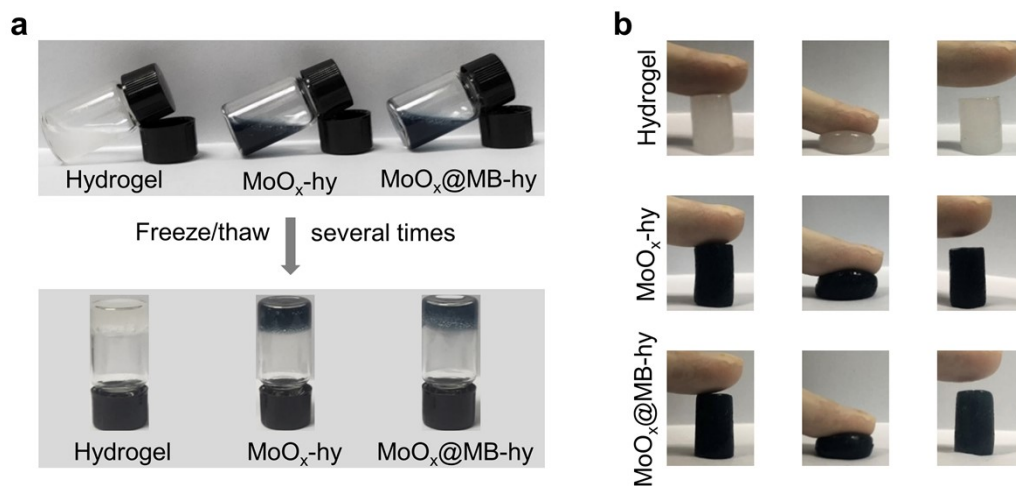

**Fig. S4** (a) The synthetic processes of hydrogels. (b) Compression photographs of pure hydrogel,  $\text{MoO}_x\text{-hy}$  and  $\text{MoO}_x\text{@MB-hy}$ .

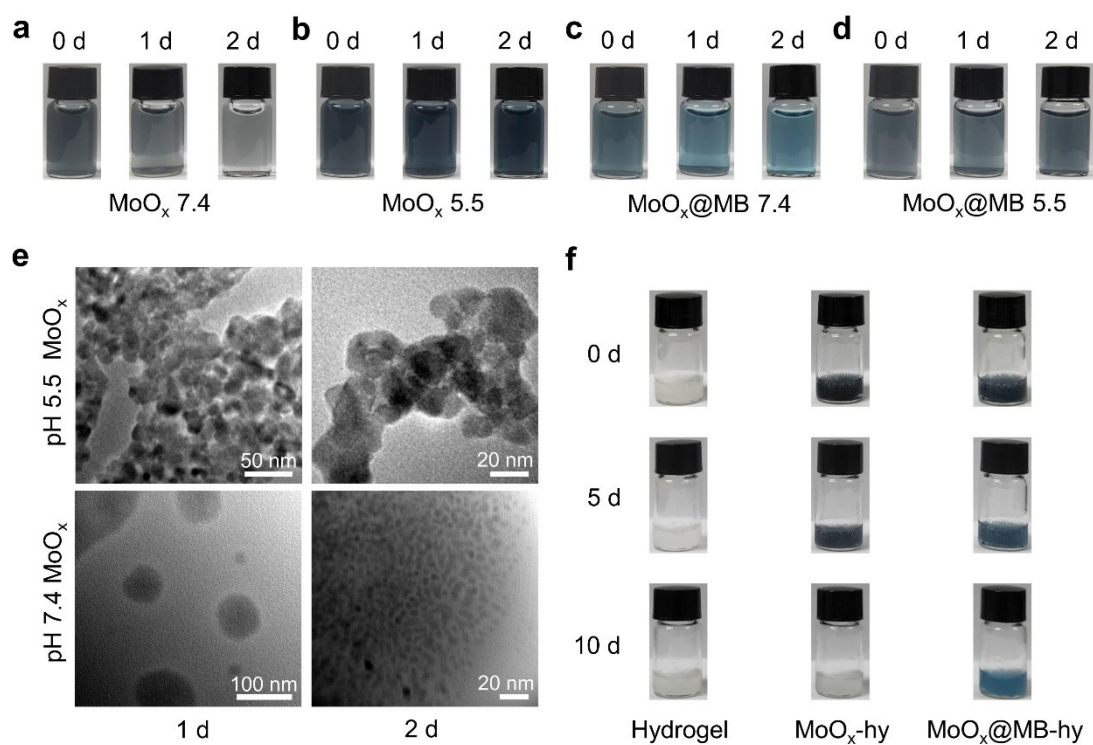

**Fig. S5** Photographs of color changes during the degradation process of MoO<sub>x</sub> NPs in (a) pH=7.4 and (b) pH=5.5 buffer solutions at fixed time intervals 0 d, 1 d and 2d. Photographs of color changes during the degradation process of MoO<sub>x</sub>@MB NPs in (c) pH=7.4 and (d) pH=5.5 buffer solutions at fixed time intervals 0 d, 1 d and 2d. (e) TEM images of MoO<sub>x</sub> NPs during the degradation process in pH=7.4 and PH=5.5 buffer solutions at fixed time intervals 1 d and 2d. (f) Photographs of color changes of pure hydrogel, MoO<sub>x</sub>-hy and MoO<sub>x</sub>@MB-hy during the degradation process with fixed time intervals 0 d, 5 d and 10 d.

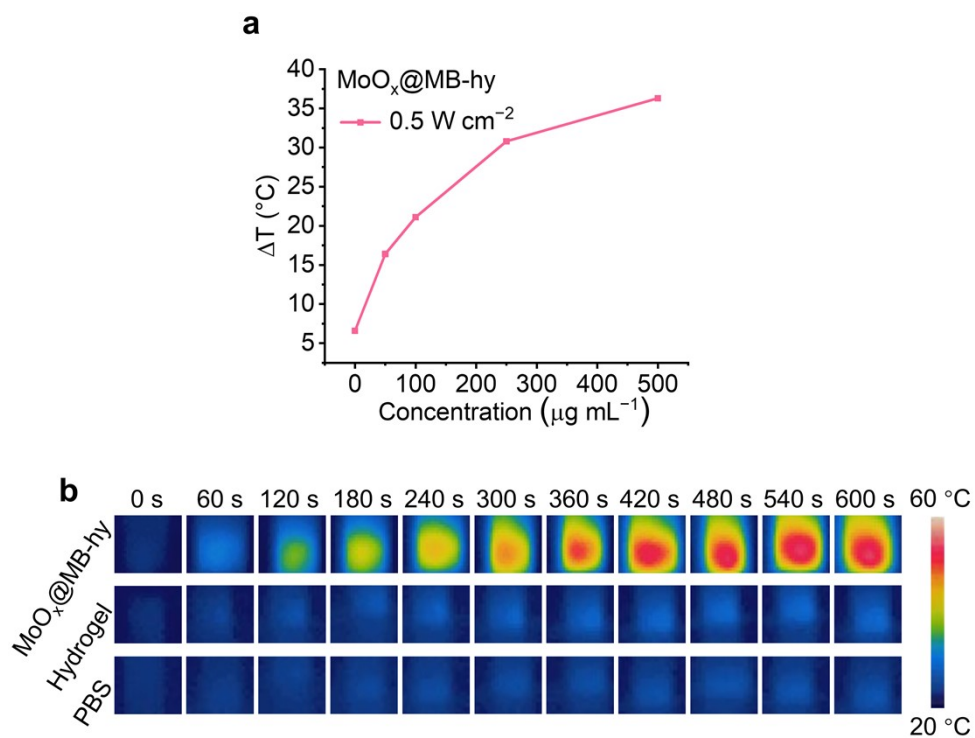

**Fig. S6** (a) Temperature change of MoO<sub>x</sub>@MB-hy at different concentrations under 1064 nm laser irradiation for 600 s. (b) Infrared thermography of PBS, pure hydrogel, and MoO<sub>x</sub>@MB-hy (250  $\mu\text{g mL}^{-1}$ ) under 1064 nm laser irradiation (0.5 W  $\text{cm}^{-2}$ ).

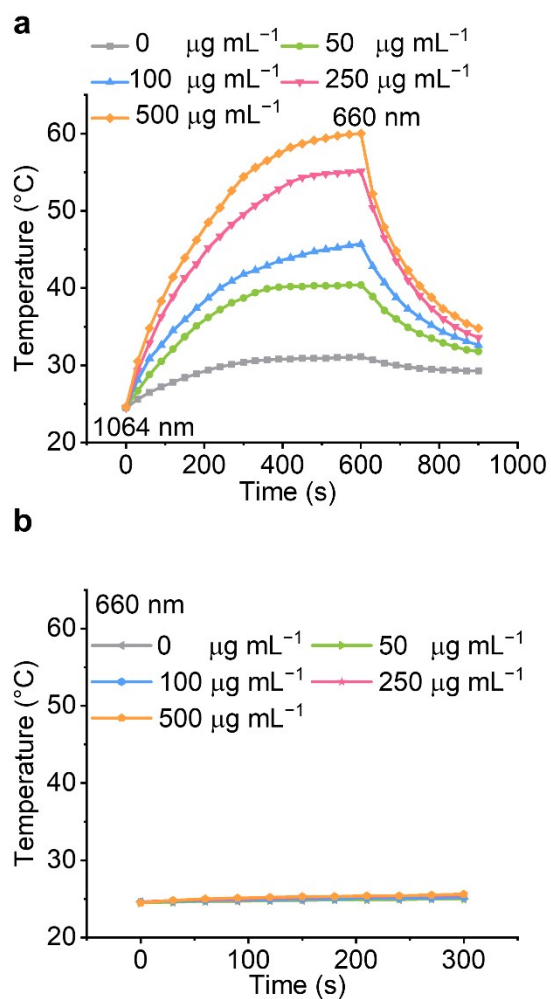

**Fig. S7** (a) Temperature elevation of MoO<sub>x</sub>@MB-hy with various concentrations under NIR-II laser irradiation (0.5 W cm<sup>-2</sup>) and 660 nm laser irradiation (100 mW cm<sup>-2</sup>). (b) Temperature elevation of MoO<sub>x</sub>@MB-hy with various concentrations under 660 nm (100 mW cm<sup>-2</sup>) laser irradiation.

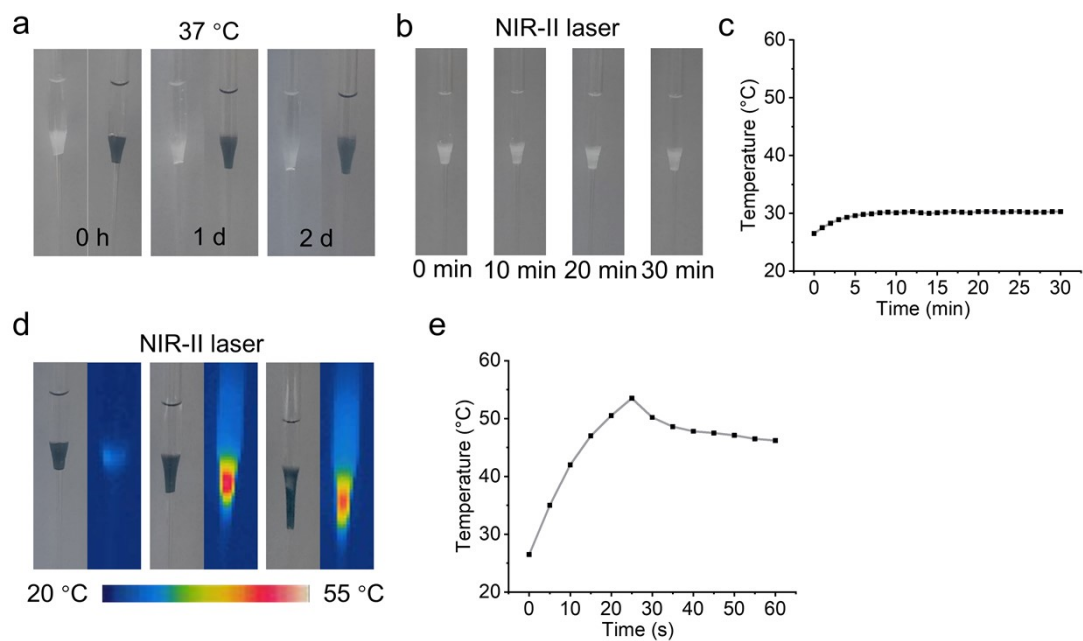

**Fig. S8** Visualization of the pure hydrogel and MoO<sub>x</sub>@MB-hy placed in the glass pipettes for stability and liquefaction studies; (a) Pure hydrogel and MoO<sub>x</sub>@MB-hy were robust and stable at 37 °C for 2 days. (b) Pure hydrogel irradiated by NIR-II laser at 0.5 W cm<sup>-2</sup> for 30 min and (c) temperature was recorded. (d) Snapshot images illustrating evolution of temperature within the MoO<sub>x</sub>@MB-hy upon NIR-II irradiation at 0.5 W cm<sup>-2</sup> and ensuing material liquefaction for MoO<sub>x</sub>@MB-hy. (e) Quantification of temperature of the MoO<sub>x</sub>@MB-hy upon NIR-II irradiation.



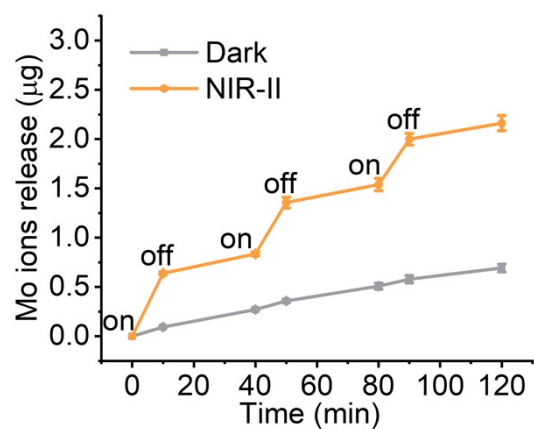

**Fig. S9** NIR-II-triggered Mo ions release from MoO<sub>x</sub>@MB-hy. The MoO<sub>x</sub>@MB-hy was irradiated with NIR-II laser (0.5 W cm<sup>-2</sup>) for 10 min followed by an interval of 30 min each time.

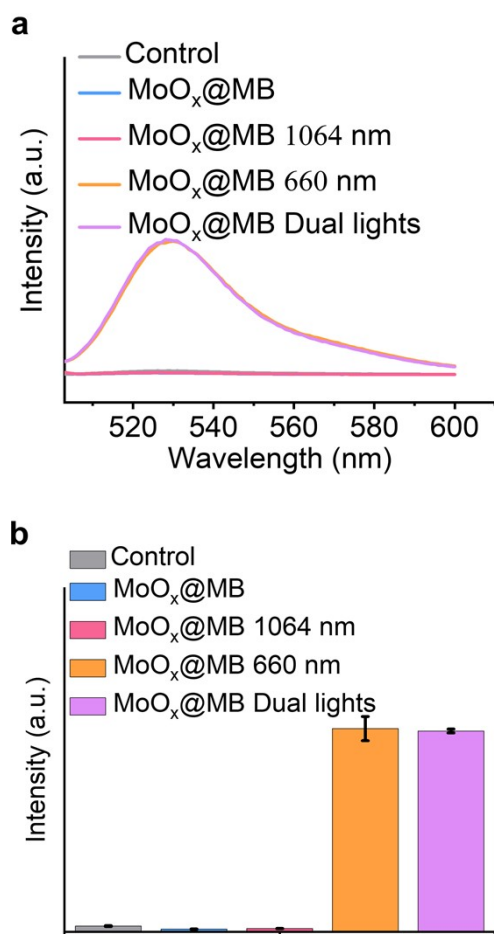

**Fig. S10** (a,b) Fluorescence spectra and corresponding intensities of SOSG after various treatments.

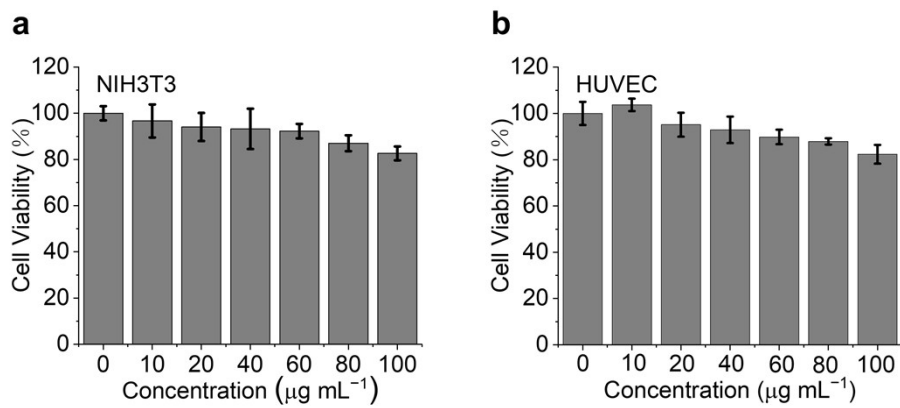

**Fig. S11** (a,b) Cell viabilities of NIH3T3 and HUVEC cells after being cultivated (24 h) with  $\text{MoO}_x@MB$  NPs with different concentrations.

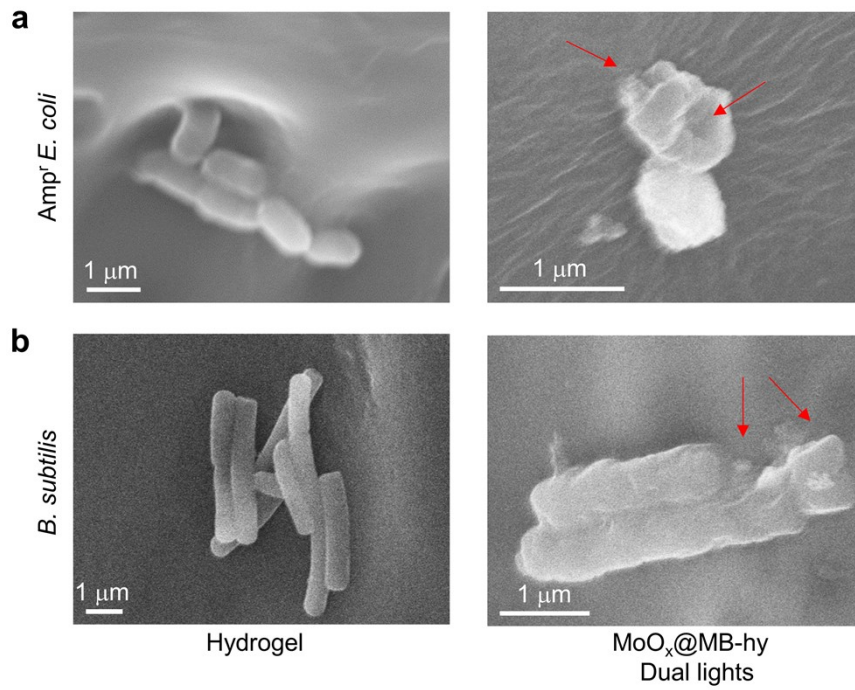

**Fig. S12** Morphologies observation of (a) *Amp<sup>r</sup> E. coli* and (b) *B. subtilis* adhere to the pure hydrogel and MoO<sub>x</sub>@MB-hy by FE-SEM.

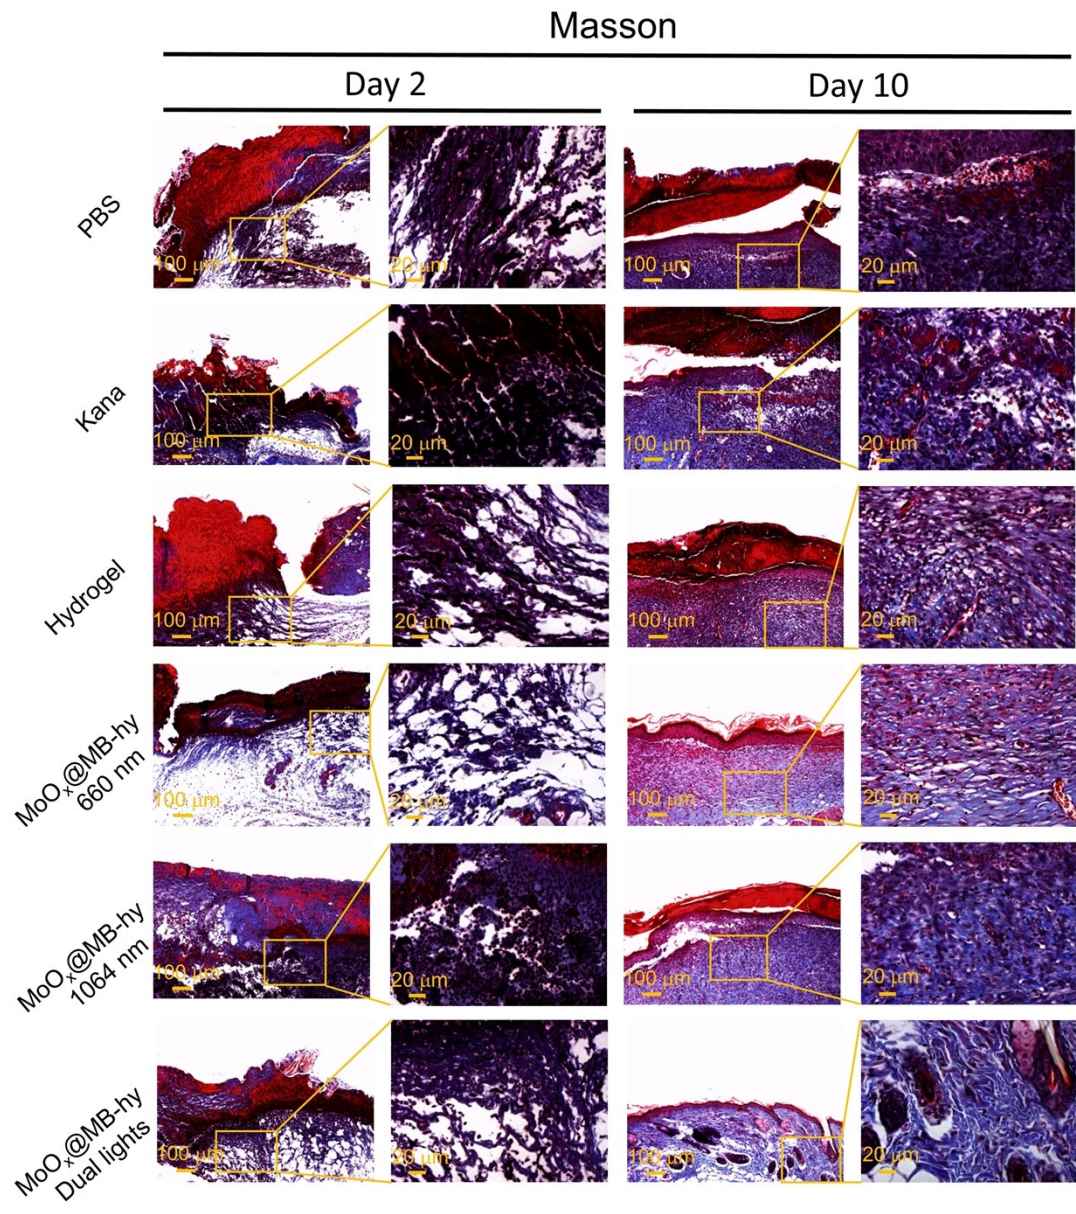

**Fig. S13** Masson staining images of infected wound tissues after various treatments.

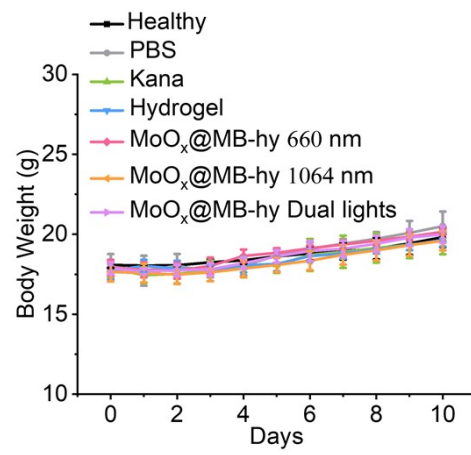

**Fig. S14** Body weights of mice after different treatments.

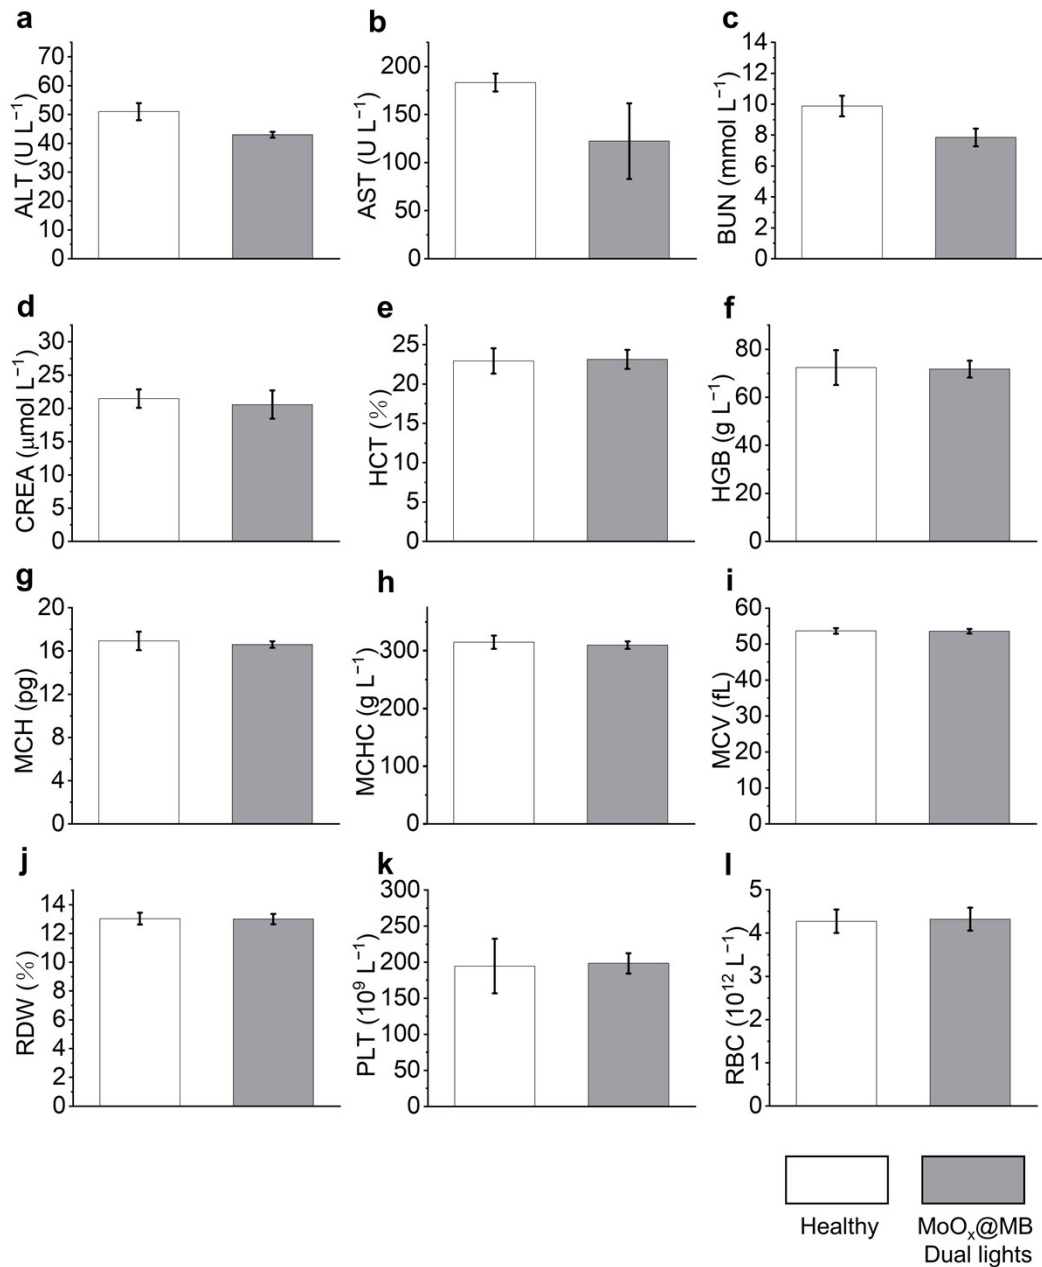

**Fig. S15** Blood biochemical assay and hematology analysis of the mice at the tenth day. Alanine aminotransferase (ALT); aspartate aminotransferase (AST); blood urea nitrogen (BUN); creatinine (CREA); hematocrit (HCT); hemoglobin (HGB); mean corpuscular hemoglobin (MCH); mean corpuscular hemoglobin concentration (MCHC); mean corpuscular volume (MCV); red cell distribution width (RDW); platelet (PLT); red blood cells (RBC).

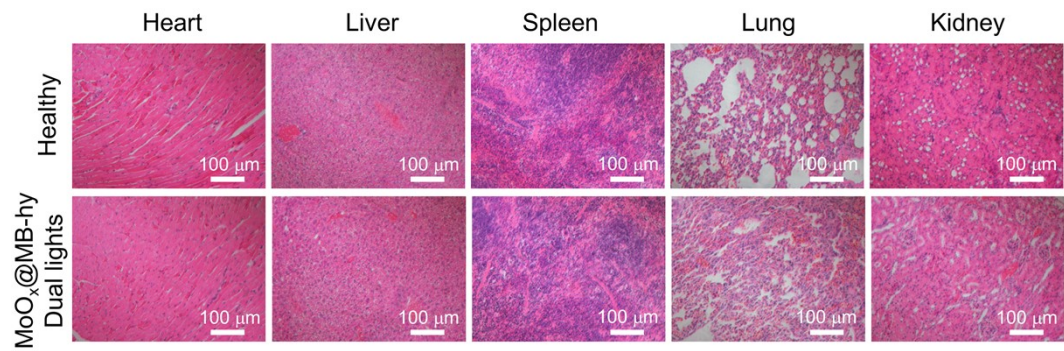

**Fig. S16** H&E stained images of the main organs treated with different groups at the tenth day.
